# Supplementary material
Source: PubMed Central journal article supplement (PMC2823578)
Supplement: jcs.060319_1.pdf [file jcs.060319_1.pdf]

**Table S1. Fission yeast strains used in this study**

| Strain  | Genotype                                                                    | Reference/source                 |
|---------|-----------------------------------------------------------------------------|----------------------------------|
| 972     | <i>h<sup>-</sup></i>                                                        | Lab stock                        |
| JY450   | <i>h<sup>90</sup> ade6-M216 leu1-32</i>                                     | M. Yamamoto                      |
| JT293   | <i>h<sup>90</sup> ade6-M216 leu1 ura4-D18 ste20::ura4<sup>+</sup></i>       | Matsuo et al., 2007              |
| JZ858   | <i>h<sup>90</sup> ade6-M216 leu1 ura4-D18 cgs1::ura4<sup>+</sup></i>        | Kunitomo et al., 2000            |
| TA99    | <i>h<sup>-</sup> ade6-M216 leu1-32 ura4-D18 tor1::ura4<sup>+</sup></i>      | Weisman and Choder, 2001         |
| FY13927 | <i>h<sup>90</sup> leu1 ura4-D18 phh1::ura4<sup>+</sup></i>                  | National-Bio-Resource-Project    |
| PJ001   | <i>h<sup>-</sup> tsc2::kanMX</i>                                            | Aspuria and Tamanoi, 2008        |
| JUp1188 | <i>mycRhb1<sup>+</sup></i>                                                  | Lab stock                        |
| JUp1190 | <i>mycRhb1<sup>V17A</sup></i>                                               | Lab stock                        |
| JUp1194 | <i>mycRhb1<sup>K120R</sup></i>                                              | Lab stock                        |
| JUp1204 | <i>h<sup>90</sup> FY155</i>                                                 | S. Forsburg                      |
| JUp1209 | <i>h<sup>90</sup> leu1-32 ura4-D18</i>                                      | Lab stock                        |
| JUp1210 | <i>h<sup>90</sup> ura4-D18</i>                                              | Lab stock                        |
| JUp1211 | <i>h<sup>90</sup> leu1-32</i>                                               | Lab stock                        |
| JUp1246 | <i>h<sup>90</sup></i>                                                       | Lab stock                        |
| JUp1247 | <i>h<sup>90</sup> tor2-ts6</i>                                              | Lab stock Matsuo et al., 2007    |
| JUp1252 | <i>h<sup>90</sup> tor2-ts10</i>                                             | Lab stock Matsuo et al., 2007    |
| JUp1348 | <i>h<sup>90</sup> tor2<sup>+</sup>:kanMX</i>                                | Urano et al., 2007               |
| JUp1350 | <i>h<sup>90</sup> tor2<sup>L1310P</sup>:kanMX</i>                           | Urano et al., 2007               |
| JUp1352 | <i>h<sup>90</sup> tor2<sup>E2221K</sup>:kanMX</i>                           | Urano et al., 2007               |
| AN0066  | <i>h<sup>-</sup> fkh1::ura4<sup>+</sup></i>                                 | This study, Weisman et al., 2005 |
| AN0083  | <i>h<sup>-</sup> tor2<sup>S1837E</sup>:kanMX</i>                            | This study                       |
| AN0094  | <i>h<sup>-</sup> rps601::hphMX</i>                                          | This study                       |
| AN0097  | <i>h<sup>-</sup> rps602::hphMX</i>                                          | This study                       |
| AN0098  | <i>h<sup>90</sup> rps602::kanMX leu1-32</i>                                 | This study                       |
| AN0129  | <i>h<sup>90</sup> rps601::hphMX kanMX:rps602-pro-myc-rps602<sup>+</sup></i> | This study                       |
| AN0228  | <i>h<sup>-</sup> rps601::hphMX<br/>rps602SS235236AA:kanMX #1</i>            | This study                       |
| AN0229  | <i>h<sup>-</sup> rps601::hphMX<br/>rps602SS235236AA:kanMX #2</i>            | This study                       |
